# Supplementary material
Source: PubMed Central journal article supplement (PMC4955744)
Supplement: NIHMS791536-supplement-2.pdf [file NIHMS791536-supplement-2.pdf]

**Supplemental Table 1:**

| <b>Panel 1 (AIM Assay, Lymphoid Tissue)</b> |                       |                |              |
|---------------------------------------------|-----------------------|----------------|--------------|
| <b>Marker</b>                               | <b>Fluorochrome</b>   | <b>Company</b> | <b>Clone</b> |
| CD4                                         | APC                   | BioLegend      | L200         |
| CD20                                        | Brilliant Violet™ 650 | BioLegend      | 2H7          |
| PD1                                         | Brilliant Violet™ 785 | BioLegend      | EH12.2H7     |
| CXCR5                                       | PE-Cy7                | eBioscience    | MU5UBEE      |
| CD45RA                                      | V450                  | BD             | 5H9          |
| CD25                                        | FITC                  | BioLegend      | BC96         |
| OX40                                        | PE                    | BD             | L106         |
| Fixable Viability Dye                       | eFluor®780            | eBioscience    |              |

| <b>Panel 2 (AIM Assay, PBMC)</b> |                       |                |              |
|----------------------------------|-----------------------|----------------|--------------|
| <b>Marker</b>                    | <b>Fluorochrome</b>   | <b>Company</b> | <b>Clone</b> |
| CD4                              | Brilliant Violet™ 650 | BioLegend      | OKT-4        |
| CD20                             | Brilliant Violet™ 570 | BioLegend      | 2H7          |
| PD1                              | Brilliant Violet™ 785 | BioLegend      | EH12.2H7     |
| CXCR5                            | PE-Cy7                | eBioscience    | MU5UBEE      |
| CD45RA                           | V450                  | BD             | 5H9          |
| CD14                             | eFluor®780            | eBioscience    | HCD14        |
| CD16                             | eFluor®780            | eBioscience    | CB16         |
| CD25                             | FITC                  | BioLegend      | BC96         |
| OX40                             | PE                    | BD             | L106         |
| ICOS                             | PerCP Cy5.5           | BioLegend      | C398.4A      |
| Fixable Viability Dye            | eFluor®780            | eBioscience    |              |

| <b>Panel 3 (ICS Assay)</b> |                       |                |              |
|----------------------------|-----------------------|----------------|--------------|
| <b>Marker</b>              | <b>Fluorochrome</b>   | <b>Company</b> | <b>Clone</b> |
| CD4                        | Brilliant Violet™ 650 | BioLegend      | OKT-4        |
| CD20                       | Brilliant Violet™ 570 | BioLegend      | 2H7          |
| PD1                        | Brilliant Violet™ 785 | BioLegend      | EH12.2H7     |
| CXCR5                      | PE-Cy7                | eBioscience    | MU5UBEE      |
| CD45RA                     | V450                  | BD             | 5H9          |
| CD40L                      | PerCP-eFluor®710      | eBioscience    | 24-31        |
| TNF                        | Alexa Fluor®700       | eBioscience    | MAb11        |
| IFN $\gamma$               | FITC                  | eBioscience    | 45.B3        |
| IL-2                       | Alexa Fluor®700       | BioLegend      | MQ1-17H12    |
| IL-21                      | PE                    | eBioscience    | 3A3-N2       |
| Fixable Viability Dye      | eFluor®780            | eBioscience    |              |
